# Supplementary material
Source: PubMed Central journal article supplement (PMC4936566)
Supplement: supp_pp.16.00359_PP2016-00359R1_Supplemental_Materialfigstbls.pdf [file supp_pp.16.00359_PP2016-00359R1_Supplemental_Materialfigstbls.pdf]

1 **Supplemental Figure S1.**

2

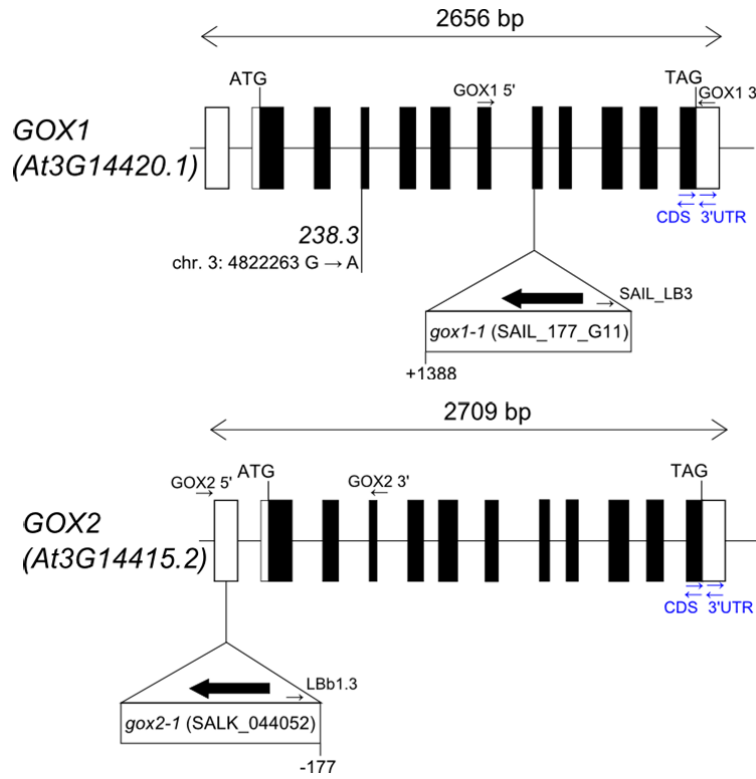

3

4

5 **Supplemental Figure S1.** *GOX1* and *GOX2* gene models, together with T-DNA insertion  
6 sites in the knockout SAIL\_177\_G11 (*gox1-1*) and SALK\_044052 (*gox2-1*) lines, as well as  
7 the EMS-induced single nucleotide polymorphism in line 238.3. Black and white boxes  
8 represent protein-coding and untranslated regions, respectively. Black arrows indicate primers  
9 used for genotyping and blue arrows – primers used for qRT-PCR.

10

11 **Supplemental Figure S2.**

12

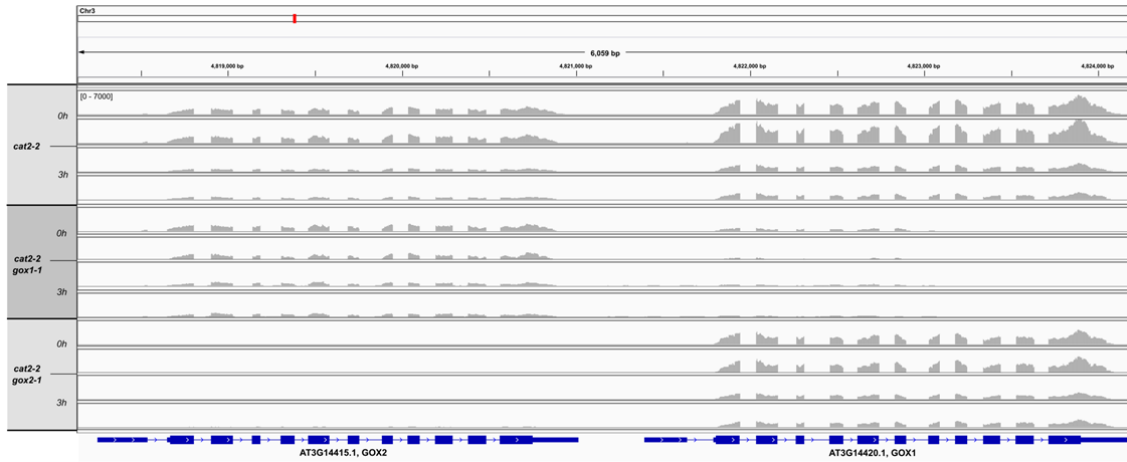

13

14

15 **Supplemental Figure S2.** Read coverage of *GOX1* and *GOX2* loci from RNA-seq analysis of  
16 *cat2-2 gox1-1*, *cat2-2* and *cat2-2 gox2-1* mutants. Aligning of reads obtained by RNA-seq  
17 from *cat2-2*, *cat2-2 gox1-1* and *cat2-2 gox2-2* mutants before (0h) and after exposure to  
18 photorespiratory stress (3h) to the reference sequences of *GOX1* and *GOX2*.

19

20 **Supplemental Figure S3.**

21

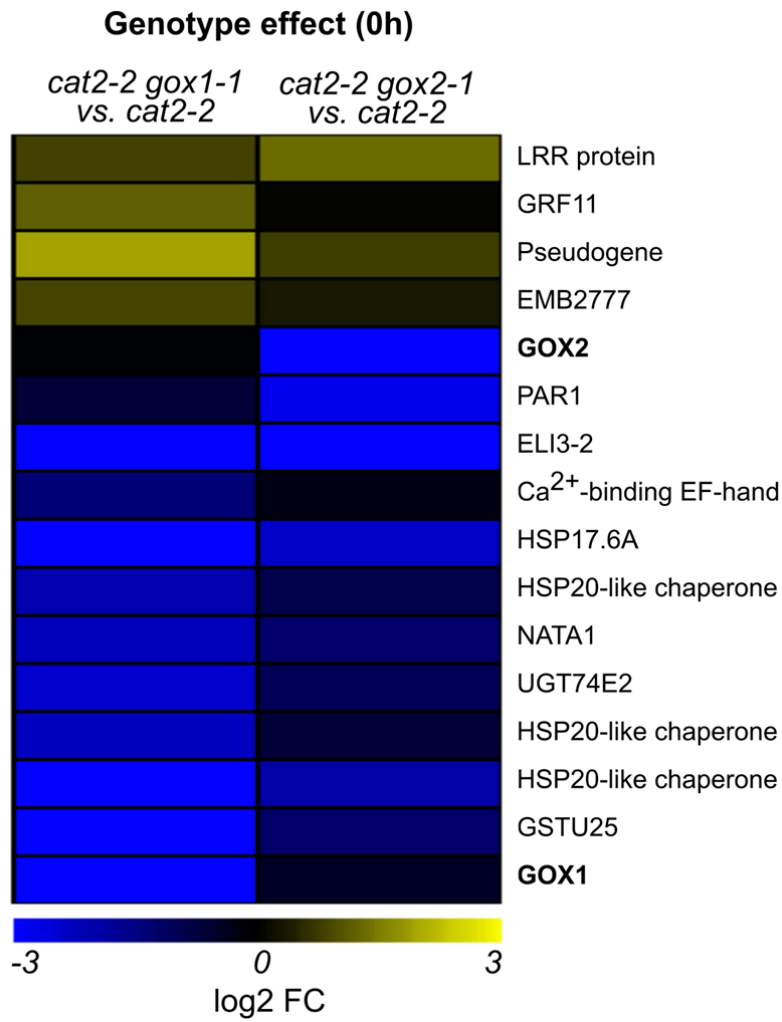

22

23

24 **Supplemental Figure S3.** Heat map of differentially expressed transcripts ( $|\log_2 \text{FC}| > 1$ ,  
 25  $\text{FDR} < 0.05$ ) between *cat2-2 gox1-1*, *cat2-2 gox2-1* and *cat2-2* mutants under control high  
 26  $\text{CO}_2$  conditions aimed at inhibiting the photorespiratory flux.

27

28 **Supplemental Figure S4.**

29

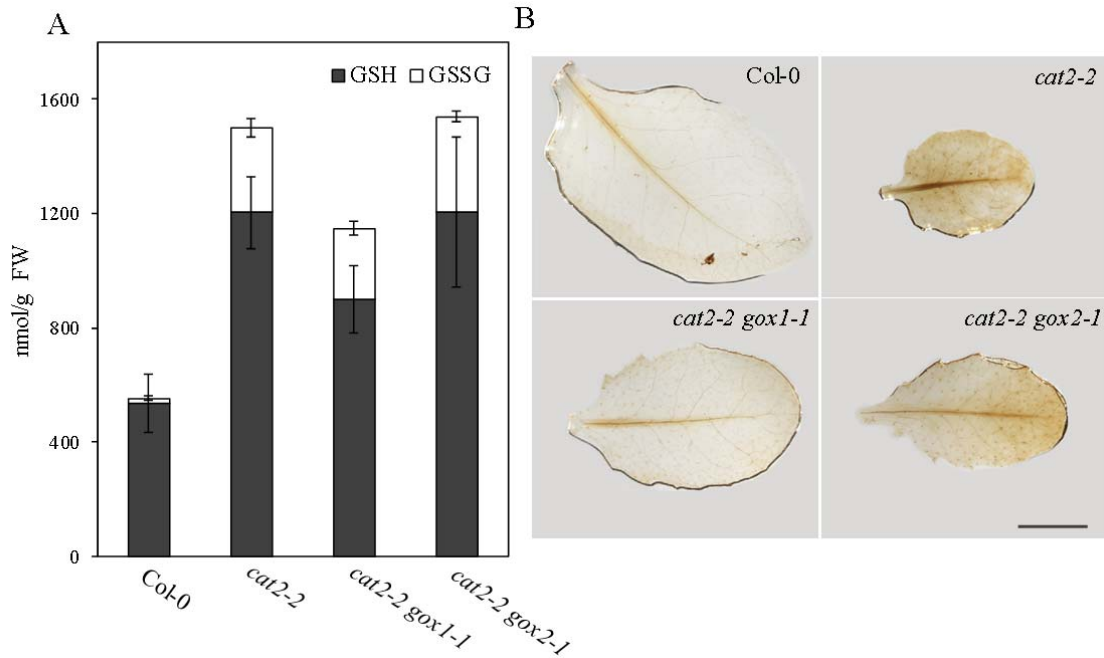

30

31

32

33 **Supplemental Figure S4.** Redox status of Col-0, *cat2-2*, *cat2-2 gox1-1* and *cat2-2 gox2-1*  
34 plants grown under ambient air and moderate light intensity ( $300 \mu\text{mol m}^{-2} \text{s}^{-1}$ ). A) Levels of  
35 reduced and oxidized glutathione (GSH and GSSG, respectively) in rosettes of three-week-old  
36 plants. Bars represent means of three biological replicates  $\pm$  SE. (B) Representative bright-  
37 field images of 3,3'-diaminobenzidine-stained mature leaves of three-week-old plants. The  
38 scale bar is 0,5 cm.

39

40 **Supplemental Figure S5.**

41

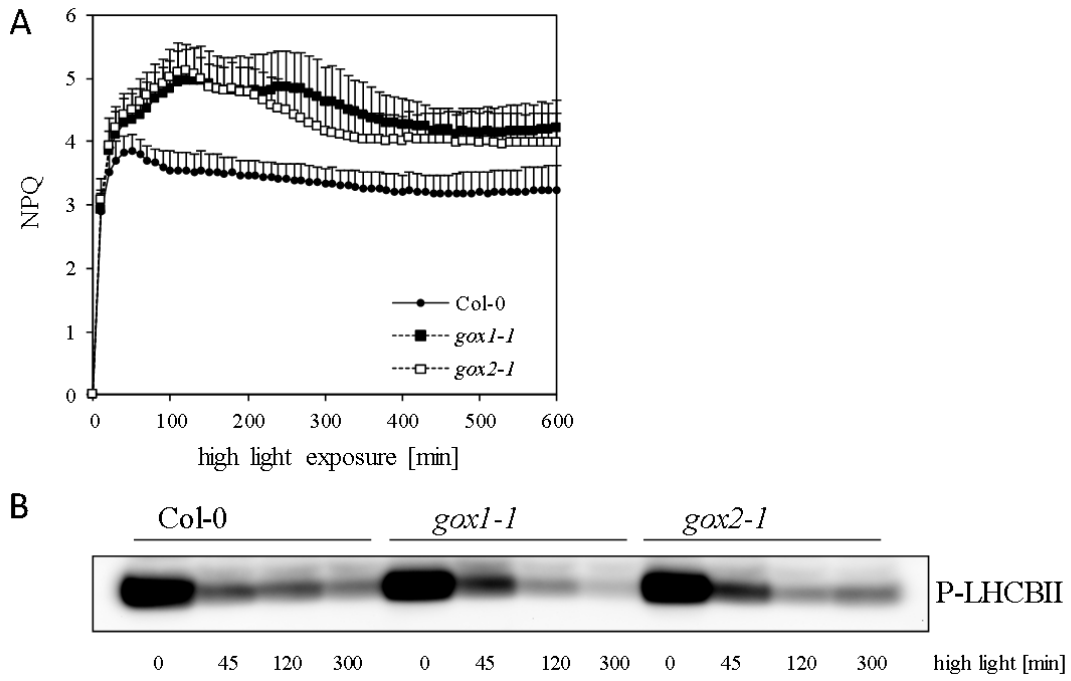

42

43

44 **Supplemental Figure S5.** Non-photochemical quenching (NPQ; A) and phosphorylation of  
45 LHCbII (B) upon exposure of Col-0, *gox1-1* and *gox2-1* plants grown under conditions  
46 limiting photorespiration to high light.

47

48 **Supplemental Figure S6.**

49

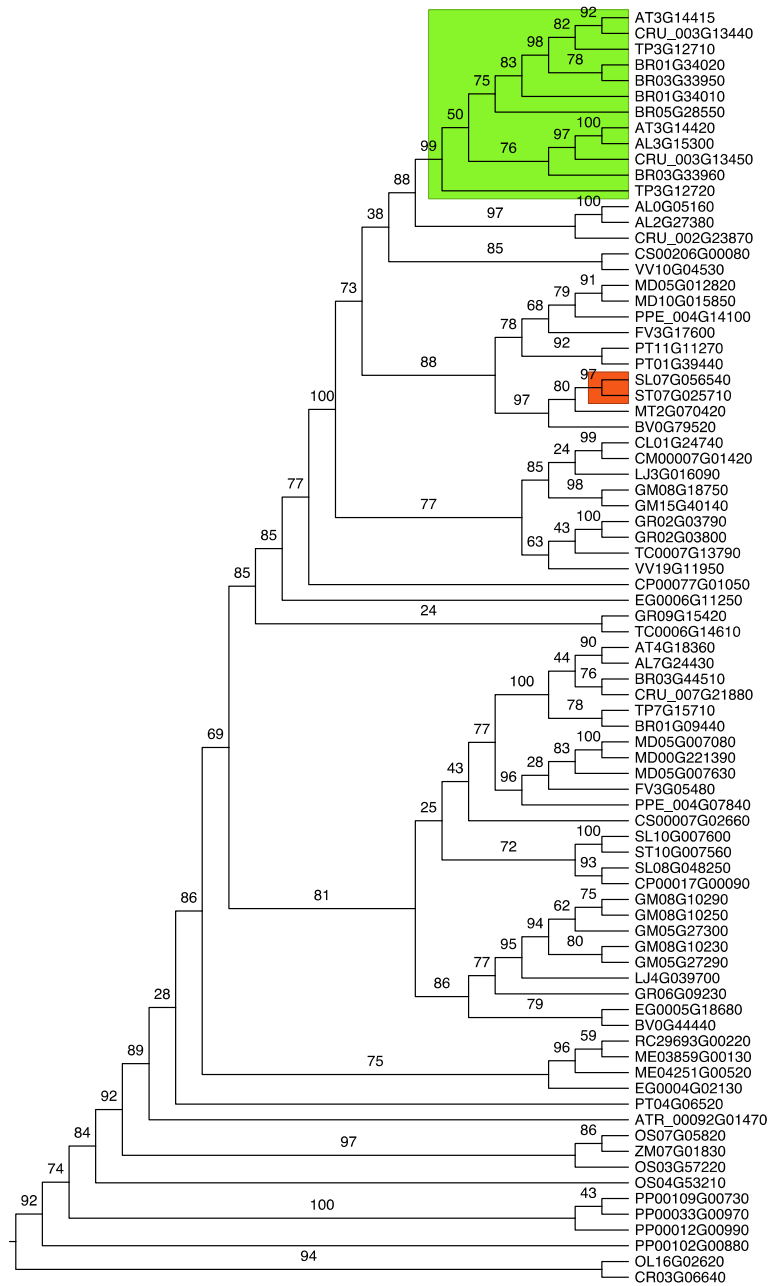

50

51 **Supplemental Figure S6.** *GOX1* and *GOX2* genes in *Brassicaceae* are clustered as  
 52 monophyletic group in the gene tree of ORTHO03D000507 from PLAZA 3.0 Dicots. *GOX1*  
 53 and *GOX2* in *Brassicaceae* are in green, and the two *GOX* genes from *Solanaceae* identified  
 54 based on synteny are shown in red. Numbers on branches denote bootstrap values.

55

56 **Supplemental Figure S7.**

57

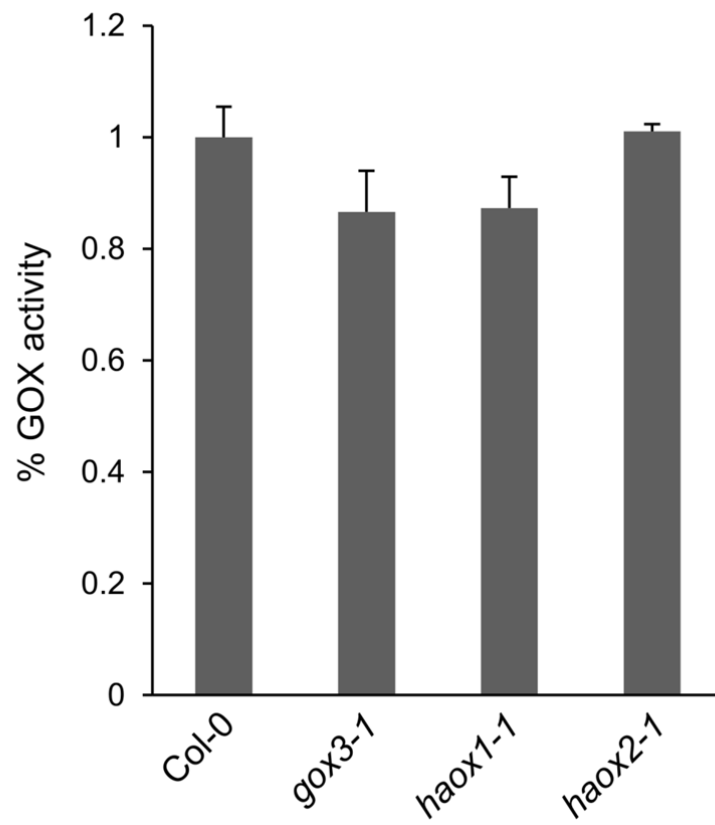

58

59

60 **Supplemental Figure S7.** Extractable leaf GOX activity. Bars represent averages from three  
61 biological replicates  $\pm$  SE.

62

63 **Supplemental Figure S8.**

64

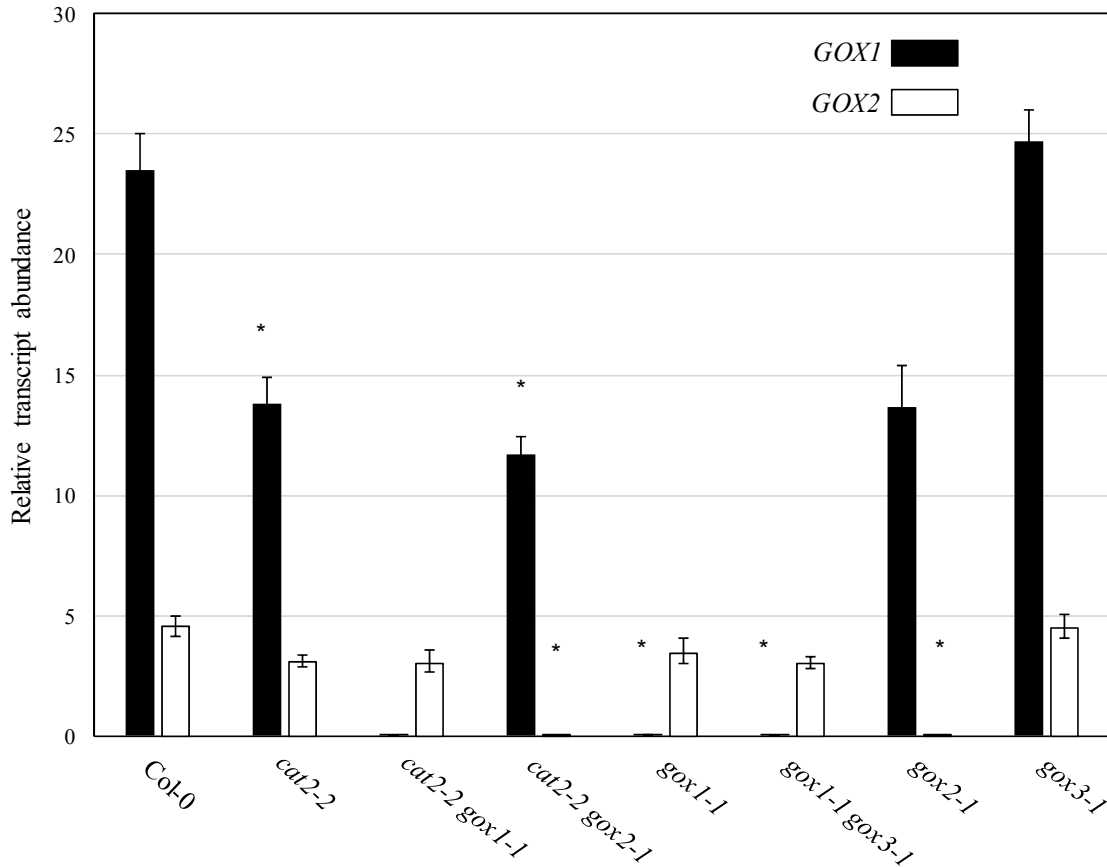

65

66

67 **Supplemental Figure S8.** *GOX1* and *GOX2* transcript abundance. RNA was extracted from  
68 rosettes of three-week-old plants grown *in vitro* and used to quantify gene expression levels  
69 by qRT-PCR. Values are means  $\pm$  SD of four biological replicates. Asterisks indicate  
70 significant difference ( $p < 0.05$ ) in comparison to Col-0 according to one-way ANOVA.

71



72 **Supplemental Table S1.** Maximum likelihood estimates of parameters under branch models  
 73 on both post-duplication branches leading to the *GOX1* and *GOX2* clades.

74

| <b>Model</b>                                                  | <b><math>p</math></b> | <b><math>\ell</math></b> | <b><math>\kappa</math></b> | <b><math>\omega_0</math></b> | <b><math>\omega_{GOX1}</math></b> | <b><math>\omega_{GOX2}</math></b> |
|---------------------------------------------------------------|-----------------------|--------------------------|----------------------------|------------------------------|-----------------------------------|-----------------------------------|
| A: One ratio: $\omega_0 = \omega_{GOX1} = \omega_{GOX2}$      | 33                    | -5437.64                 | 1.71                       | 0.070                        | 0.070                             | 0.070                             |
| B: Two ratios: $\omega_0 = \omega_{GOX1}, \omega_{GOX2}$      | 34                    | -5432.37                 | 1.69                       | 0.067                        | 0.067                             | 31.293                            |
| C: Two ratios: $\omega_0 = \omega_{GOX2}, \omega_{GOX1}$      | 34                    | -5436.67                 | 1.71                       | 0.069                        | 0.233                             | 0.069                             |
| D: Two ratios: $\omega_0, \omega_{GOX1} = \omega_{GOX2}$      | 34                    | -5433.50                 | 1.71                       | 0.067                        | 0.291                             | 0.291                             |
| E: Three ratios: $\omega_0, \omega_{GOX1}, \omega_{GOX2}$     | 35                    | -5432.21                 | 1.70                       | 0.066                        | 0.105                             | 3.941                             |
| F: Two ratios: $\omega_0 = \omega_{GOX1}, \omega_{GOX2} = 1$  | 33                    | -5432.55                 | 1.70                       | 0.067                        | 0.067                             | 1.000                             |
| G: Two ratios: $\omega_0 = \omega_{GOX2}, \omega_{GOX1} = 1$  | 33                    | -5437.34                 | 1.72                       | 0.068                        | 1.000                             | 0.068                             |
| H: Two ratios: $\omega_0, \omega_{GOX1} = \omega_{GOX2} = 1$  | 33                    | -5436.17                 | 1.72                       | 0.066                        | 1.000                             | 1.000                             |
| I: Three ratios: $\omega_0, \omega_{GOX1}, \omega_{GOX2} = 1$ | 34                    | -5432.30                 | 1.70                       | 0.067                        | 0.116                             | 1.000                             |
| J: Three ratios: $\omega_0, \omega_{GOX2}, \omega_{GOX1} = 1$ | 34                    | -5435.07                 | 1.73                       | 0.066                        | 1.000                             | 0.275                             |

75

76  $p$ , number of free parameters in the model;  $\ell$ , log-likelihood;  $\kappa$ , the ratio of transition to  
 77 transversion;  $\omega_{GOX1}$  and  $\omega_{GOX2}$ , the ratio of non-synonymous substitution rate (dN) to  
 78 synonymous substitution rate (dS) on the two post-duplication branches to *GOX1* and *GOX2*  
 79 clades, respectively;  $\omega_0$ , dN/dS for rest of the branches on the tree

80

81 **Supplemental Table S2.** Likelihood ratio tests for comparing different branch models  
82 applied to both post-duplication branches leading to the *GOX1* and *GOX2* clades.

83

| <b>Model comparisons</b> | <b>2<math>\Delta\ell</math></b> | <b>df</b> | <b>p value</b> |
|--------------------------|---------------------------------|-----------|----------------|
| A-D                      | 8.295754                        | 1         | 0.003973788    |
| A-B                      | 10.542752                       | 1         | 0.001166446    |
| C-E                      | 8.923886                        | 1         | 0.00281465     |
| A-C                      | 1.944748                        | 1         | 0.16315393     |
| B-E                      | 0.325882                        | 1         | 0.568094036    |
| D-H                      | 5.342664                        | 1         | 0.020809648    |
| B-F                      | 0.348118                        | 1         | 0.555180423    |
| E-I                      | 0.177828                        | 1         | 0.673246506    |
| C-G                      | 1.331848                        | 1         | 0.248476723    |
| E-J                      | 5.729078                        | 1         | 0.016686241    |

84

85 2 $\Delta\ell$ , likelyhood ratio statistics; df, degree of freedom

86

87 **Supplemental Table S3.** The modified branch-site models for detecting positive selection on  
88 six branches after the duplication event leading to *GOX2* in *Arabidopsis*.

89

| <b>Branch</b> | <b><math>\ell_{H0}</math></b> | <b><math>\ell_{HA}</math></b> | <b><math>2\Delta\ell</math></b> | <b>df</b> | <b>p value</b> |
|---------------|-------------------------------|-------------------------------|---------------------------------|-----------|----------------|
| #1            | -5401.887282                  | -5401.781842                  | 0.21088                         | 1         | 0.32303927     |
| #2            | -5401.767414                  | -5401.577101                  | 0.38062                         | 1         | 0.26863420     |
| #3            | -5402.937338                  | -5402.85316                   | 0.16835                         | 1         | 0.34078851     |
| #4            | -5403.195792                  | -5403.195793                  | 2E-06                           | 1         | 0.49943581     |
| #5            | -5403.170388                  | -5403.170388                  | 0                               | 1         | 0.5            |
| #6            | -5402.919624                  | -5402.047157                  | 1.74493                         | 1         | 0.09325743     |

90

91  $\ell_{H0}$ , log likelihood for the branch-site model without positive selection;  $\ell_{HA}$ , log likelihood for  
92 the branch-site model with positive selection;  $2\Delta\ell$ , likelihood ratio statistics; df, degree of  
93 freedom

94

95 **Supplemental Table S4.** List of primers used in the study.

96

| <b>Primer name</b>       | <b>Use</b> | <b>Sequence</b>                   |
|--------------------------|------------|-----------------------------------|
| gox1_SAIL_177_G11_newLP1 | Genotyping | GGGAATCACAAGAAATTGATC             |
| gox1_SAIL_177_G11_RP     | Genotyping | GAAGGACTTGACCTCGGAAAG             |
| gox2_SALK_044052_LP      | Genotyping | ATACCATGATGGTTCCAGCAG             |
| gox2_SALK_044052_RP      | Genotyping | TTGTTATGTTTCGTCAAGCCC             |
| gox3_GABI_523D09_LP      | Genotyping | TTGGATGGGAATACTTTATTGG            |
| gox3_GABI_523D09_RP      | Genotyping | GCATCAACCTTTTGCTTGAAG             |
| haox1_SAIL_84_A04_newLP2 | Genotyping | AGAGGACAAGAGGAGCAAGATTC           |
| haox1_SAIL_84_A04_RP     | Genotyping | GCGCTTTGAAAACATCTGTTC             |
| haox2_SALK_102409_LP     | Genotyping | GGAAACTTGGTCTCCATCAGG             |
| haox2_SALK_102409_RP     | Genotyping | GCTCGACTATCCCCCTGCTAC             |
| LBb1.3                   | Genotyping | ATTTTGCCGATTCGGAAC                |
| SAIL_LB3                 | Genotyping | TAGCATCTGAATTCATAACCAATCTCGATACAC |
| GK_o8474                 | Genotyping | ATAATAACGCTGCGGACATCTACATTTT      |
| SALK_newLB1              | Genotyping | TGGACCGCTTGCTGCAACTCTC            |
| CAT2_LP                  | Genotyping | CCCAGAGGTACCTCTTCTTCTCCCATG       |
| CAT2_RP                  | Genotyping | TCAGGGAACCTTCATCCCATCGC           |
| GOX1_F_CDS               | qRT-PCR    | TTCATTTGGCAGCTGAAGGA              |
| GOX1_R_CDS               | qRT-PCR    | GAGTGTCCCATTTCGGTGGTA             |
| GOX2_F_CDS               | qRT-PCR    | TTTGCCTAGCTGCTGAAGGA              |
| GOX2_R_CDS               | qRT-PCR    | ATAACCTGGGCAAATGGCGT              |
| GOX1_F                   | qRT-PCR    | AGAACAGCAGCAACACAGAAC             |
| GOX1_R                   | qRT-PCR    | CACTAGGCTTGGTTTGTGATCTGATA        |
| GOX2_F                   | qRT-PCR    | ATATCTCGAAAACTTGTTTCTCCCTATAT     |
| GOX2_R                   | qRT-PCR    | ATCTATTGTACAAGCAATAAGAATAAACGG    |
| EF1a_F                   | qRT-PCR    | TCCGTCGGAGCTCAATTCTC              |
| EF1a_R                   | qRT-PCR    | AGGAAGCTCGAGTGCCAAGTAC            |
| UBQ5_F                   | qRT-PCR    | CTGCATTTCTATTTGGGAATTTTGTA        |
| UBQ5_R                   | qRT-PCR    | ATCCAGAACGAAAGATGTTCAACATAG       |

97

98

99 **Supplemental Table S5.** Mutations enriched in line 238.3.

100

| Chromosome | Position | Reference base | Mutant | Coverage | Frequency | Region             | AGI code         | Position in gene | Position in codon | Reference amino acid | Mutant |
|------------|----------|----------------|--------|----------|-----------|--------------------|------------------|------------------|-------------------|----------------------|--------|
| 3          | 4822263  | G              | A      | 65       | 0.9       | CDS                | <i>At3g14420</i> | 263              | 2                 | G                    | E      |
| 3          | 7636562  | G              | A      | 40       | 0.89      | intergenic         |                  |                  |                   |                      |        |
| 3          | 6290758  | G              | A      | 60       | 0.86      | intergenic         |                  |                  |                   |                      |        |
| 3          | 3807077  | G              | A      | 54       | 0.84      | intergenic         |                  |                  |                   |                      |        |
| 3          | 6145283  | G              | A      | 43       | 0.83      | five prime UTR     | <i>At3g17940</i> |                  |                   |                      |        |
| 4          | 8981113  | G              | A      | 5        | 0.83      | intronic/noncoding | <i>At4g15780</i> |                  |                   |                      |        |
| 3          | 6021032  | G              | A      | 50       | 0.82      | CDS                | <i>At3g17600</i> | 9                | 3                 | V                    | V      |
| 3          | 436295   | C              | T      | 60       | 0.8       | CDS                | <i>At3g02260</i> | 11022            | 3                 | E                    | E      |
| 3          | 3397230  | G              | A      | 37       | 0.8       | intronic/noncoding | <i>At3g10845</i> |                  |                   |                      |        |
| 3          | 6031593  | G              | A      | 51       | 0.8       | CDS                | <i>At3g17630</i> | 2223             | 3                 | K                    | K      |

101

102

103 **Supplemental Table S6.** Data sources and sequence accessions.

104

| Data source                    | Species                      | Accession                        |                         |
|--------------------------------|------------------------------|----------------------------------|-------------------------|
| PLAZA 3.0<br>Dicots            | <i>Arabidopsis thaliana</i>  | AT3G14415                        |                         |
|                                |                              | AT3G14420                        |                         |
|                                | <i>Thellungiella parvula</i> | TP3G12710                        |                         |
|                                |                              | TP3G12720                        |                         |
| EnsemblPlants<br>release 30    | <i>Arabidopsis lyrata</i>    | fgenesh2_kg.3__1563__AT3G14420.2 |                         |
|                                |                              | Bra021556                        |                         |
|                                |                              | Bra021555                        |                         |
|                                |                              | Bra001550                        |                         |
|                                |                              | Bra001551                        |                         |
|                                | <i>Brassica rapa</i>         | Bra027338                        |                         |
|                                |                              | Bra027339                        |                         |
|                                |                              | <i>Solanum lycopersicum</i>      | Solyc07g056540.2        |
|                                |                              | <i>Solanum tuberosum</i>         | PGSC0003DMG400027654    |
|                                |                              | Phytozome 9                      | <i>Capsella rubella</i> |
| Carubv10013998m.g              |                              |                                  |                         |
| <i>Thellungiella halophila</i> | Thhalv10020979m.g            |                                  |                         |
|                                | Thhalv10020982m.g            |                                  |                         |

105
